# Supplementary material for: Effect of the Topology and Delayed Interactions in Neuronal Networks Synchronization
Source: PubMed Central journal article supplement (PMC3103524; doi:10.1371/journal.pone.0019900), 2011-05-27
Supplement: pone.0019900.s002.pdf [file pone.0019900.s002.pdf]

## Supporting Material

**Table 1**

| Parameter | Value   | Units              |
|-----------|---------|--------------------|
| $C_m$     | 10      | nF/mm <sup>2</sup> |
| $g_K$     | 0.36    | mS/mm <sup>2</sup> |
| $g_{Na}$  | 1.2     | mS/mm <sup>2</sup> |
| $g_L$     | 0.003   | mS/mm <sup>2</sup> |
| $V_K$     | -77     | mV                 |
| $V_{Na}$  | 50      | mV                 |
| $V_L$     | -54.387 | mV                 |

Parameters of the Hodgkin-Huxley model.
