# Supplementary material for: Effect of the Topology and Delayed Interactions in Neuronal Networks Synchronization
Source: PubMed Central journal article supplement (PMC3103524; doi:10.1371/journal.pone.0019900), 2011-05-27
Supplement: pone.0019900.s003.pdf [file pone.0019900.s003.pdf]

## Supporting Material

**Table 1**

| Parameter | Value | Units              |
|-----------|-------|--------------------|
| $C_m$     | 10    | nF/mm <sup>2</sup> |
| $g_K$     | 0.2   | mS/mm <sup>2</sup> |
| $g_{Na}$  | 1.2   | mS/mm <sup>2</sup> |
| $g_L$     | 0.003 | mS/mm <sup>2</sup> |
| $g_a$     | 0.477 | mS/mm <sup>2</sup> |
| $V_K$     | -72   | mV                 |
| $V_{Na}$  | 55    | mV                 |
| $V_L$     | -17   | mV                 |
| $V_a$     | -75   | mV                 |

Parameters of the Connor-Stevens model.
